# Supplementary material
Source: MDPI journal article supplement (https://www.mdpi.com/2077-0472/7/2/13)
Supplement: s1 [file s1]

Supplementary Materials: Mitigating Global Warming Potential and Greenhouse Gas Intensities by Applying Composted Manure in Cornfield: A 3-Year Field Study in an Andosol Soil

**Ikabongo Mukumbuta, Mariko Shimizu and Ryusuke Hatano**

**Table S1.** Rates of inorganic fertilizer nitrogen and gross manure carbon and manure nitrogen input from 2010–2012 (Experiment 1).

| **Plot** | **Year** | **Inorganic Fertilizer N**  **(kg N ha–1)** | **Manure** | |
| --- | --- | --- | --- | --- |
| **C Input** | **N Input** |
| **(Mg C ha–1)** | **(kg N ha–1)** |
| F | 2010 | 104 | - | - |
| 2011 | 104 | - | - |
| 2012 | 96.6 | - | - |
| MF1 | 2010 | 104 | 8.9 | 599 |
| 2011 | 104 | 6.7 | 216 |
| 2012 | 96.6 | 6.7 | 343 |
| MF2 | 2010 | 104 | 8.9 | 599 |
| 2011 | 104 | 6.7 | 216 |
| 2012 | 96.6 | 6.7 | 343 |
| M | 2010 | - | 8.9 | 599 |
| 2011 | - | 6.7 | 216 |
| 2012 | - | 6.7 | 343 |
| CT | 2010–2012 | - | - | - |

CT is unfertilized control plot; F is inorganic fertilizer-only plot; MF1 is inorganic fertilizer plus composted cattle manure applied since 2005 plot; MF2 is inorganic fertilizer plus composted cattle manure applied since 2010 plot; M is composted cattle manure-only plot.

**Table S2.** Rates of inorganic fertilizer nitrogen and gross manure carbon and manure nitrogen input in experiment 2.

| **Plot** | **Application Season** | **Inorganic Fertilizer N**  **(kg N ha–1)** | **Manure** | |
| --- | --- | --- | --- | --- |
| **C Input** | **N Input** |
| **(Mg C ha–1)** | **(kg N ha–1)** |
| M1 | Autumn | - | 7.3 | 450 |
| Spring | - | - | - |
| MF | Autumn | - | 7.3 | 450 |
| Spring | 104 | - | - |
| MM | Autumn | – | 7.3 | 450 |
| Spring | - | 5.0 | 300 |

M1 is autumn composted cattle manure application only plot; MF is autumn composted cattle manure plus spring inorganic fertilizer application plot; MM is autumn composted cattle manure plus additional spring composted cattle manure plot.

**Table S3.** Soil carbon and nitrogen content (% per kilogram of soil) in the F, MF1 and MF2 plots (in experiment 1) in each soil depth in 2010 and 2012.

|  |  | Organic carbon content (%) | | | Total nitrogen content (%) | | |
| --- | --- | --- | --- | --- | --- | --- | --- |
|  | **Plot** | **0–5 cm** | **5–15 cm** | **15–30 cm** | **0–5 cm** | **5–15 cm** | **15–30 cm** |
| 2010 | F | 4.6 ± 1.4 a,b,c | 4.6 ± 1.0 a,b,c | 3.4 ± 0.9 a | 0.43 ± 0.12 a,b,c,d | 0.42 ± 0.07 a,b,c,d | 0.32 ± 0.07 a |
|  | MF1 | 6.7 ± 2.0 e | 6.5 ± 2.8 d,e | 4.5 ± 1.3 a,b,c | 0.60 ± 0.16 e | 0.57 ± 0.23 d,e | 0.41 ± 0.11 a,b |
|  | MF2 | 5.2 ± 1.7 a,b,c,d,e | 4.8 ± 2.0 a,b,c,d | 4.2 ± 1.3 a,b | 0.47 ± 0.14 a,b,c,d,e | 0.45 ± 0.18 a,b,c,d,e | 0.40 ± 0.11 a,b,c |
| 2012 | F | 4.4 ± 1.0 a,b,c | 4.6 ± 0.6 a,b,c,d | 4.8 ± 1.1 a,b,c,d,e | 0.42 ± 0.09 a,b,c,d | 0.44 ± 0.06 a,b,c,d,e | 0.46 ± 0.10 a,b,c,d,e |
|  | MF1 | 6.1 ± 1.1 b,c,d,e | 6.2 ± 1.4 c,d,e | 5.3 ± 1.1 a,b,c,d,e | 0.53 ± 0.09 b,c,d,e | 0.55 ± 0.11 c,d,e | 0.46 ± 0.08 a,b,c,d,e |
|  | MF2 | 5.4 ± 1.1 a,b,c,d,e | 5.2 ± 1.1 a,b,c,d,e | 5.0 ± 0.8 a,b,c,d,e | 0.50 ± 0.10 a,b,c,d,e | 0.48 ± 0.10 a,b,c,d,e | 0.46 ± 0.07 a,b,c,d,e |

CT is unfertilized control plot; F is inorganic fertilizer-only plot; MF1 is inorganic fertilizer plus composted cattle manure applied since 2005 plot; MF2 is inorganic fertilizer plus composted cattle manure applied since 2010 plot; M is composted cattle manure-only plot. Different letters indicate significant differences between treatments, soil depth and year.

**Table S4.** Average annual CH4 and N2O emissions (in carbon dioxide equivalents; CO2-eq), net global warming potential (GWP) and net greenhouse gas intensity (GHGI) from CH4 and N2O in experiment 1.

| Year | Plot | CH4 | N2O | GWP | GHGI |
| --- | --- | --- | --- | --- | --- |
| **kg CO2–eq ha–1year–1** | | | **kg CO2–eq kg–1 yield** |
| 2010 | CT | 50.6 ± 29.1 | 1858 ± 299 b,c,d | 1909 ± 308 b,c,d,e | 0.65 ± 0.11 b,c,d,e,f |
|  | F | 170.4 ± 76.9 | 8139 ± 3784 b,d,e | 8309 ± 3715 d,e,f | 1.27 ± 0.57 c,e,f |
|  | MF1 | 17.1 ± 24.1 | 10743 ± 2646 d,e | 10760 ± 2628 e,f | 1.53 ± 0.37 d,e,f |
|  | MF2 | 123.3 ± 65.5 | 15711 ± 554 e | 15834 ± 557 f | 2.59 ± 0.09 f |
| 2011 | CT | 10.2 ± 17.5 | 2731 ± 540 a,b,c | 2741 ± 524 a,b,c,d | 0.78 ± 0.15 a,b,c,d |
|  | F | −7.2 ± 11.4 | 6392 ± 2038 b,c,d | 6384 ± 2036 b,c,d,e | 0.84 ± 0.26 a,b,c,d,e |
|  | MF1 | 12.4 ± 4.4 | 6713 ± 537 b,c,d,e | 6725 ± 537 b,c,d,e,f | 0.67 ± 0.05 a,b,c,d,e |
|  | MF2 | −22.4 ± 12.5 | 11,793 ± 2788 d,e | 11,770 ± 2786 e,f | 1.19 ± 0.28 b,c,d,e,f |
|  | M | 42.6 ± 35.1 | 5496 ± 539 a,b,c,d | 5538 ± 506 b,c,d,e | 1.28 ± 0.11 a,b,c,d,e,f |
| 2012 | CT | −5.5 ± 10.3 | 1703 ± 178 a | 1697 ± 177 a | 0.62 ± 0.06 a |
|  | F | 62.8 ± 47.5 | 3312 ± 769 a,b,c | 3375 ± 810 a,b,c | 0.53 ± 0.12 a,b,d |
|  | MF1 | −24.7 ± 4.3 | 3594 ± 293 a,b,c | 3569 ± 292 a,b,c,d | 0.42 ± 0.03 a,b,c |
|  | MF2 | 0.8 ± 10.3 | 4116 ± 940 b,c,d | 4116 ± 947 b,c,d,e | 0.47 ± 0.11 a,b,c,d,e |
|  | M | −20.6 ± 5.7 | 2615 ± 412 a,b | 2595 ± 412 a,b | 0.89 ± 0.14 a,b,c,d,e |

Note: CH4 and N2O emissions were converted to CO2–equivalents by multiplying annual emissions (shown in Table 2) by 25 and 298 respectively; GWP in this table is sum of CO2–equivalents of CH4 and N2O only; GHGI in this table was calculated by dividing GWP from CH4 and N2O by total biomass yield. Different letters within the same column indicate significant differences among the treatments.

**Figure S1.** Relationship between soil temperature (5 cm) and CO2 flux in experiment 1. CT is unfertilized control plot; F is inorganic fertilizer-only plot; MF1 is inorganic fertilizer plus composted cattle manure applied since 2005 plot; MF2 is inorganic fertilizer plus composted cattle manure applied since 2010 plot; M is composted cattle manure-only plot.

**Figure S2.** Relationship between annual N2O emission and annual average soil pH (data from experiment 1). CT is unfertilized control plot; F is inorganic fertilizer only plot; MF1 is inorganic fertilizer plus composted cattle manure applied since 2005 plot; MF2 is inorganic fertilizer plus composted cattle manure applied since 2010 plot; M is composted cattle manure only plot. Annual average soil pH was the average of soil pH values measured from all soil samples collected in each year.
